# Supplementary material
Source: ML conference proceedings conference paper supplement (https://openaccess.thecvf.com/content/CVPR_2019/html/James_Sim-To-Real_via_Sim-To-Sim_CVPR_2019_paper.html)
Supplement: Supplementary file 1 [file James_Sim-To-Real_via_Sim-To-Sim_CVPR_2019_supplemental.pdf]

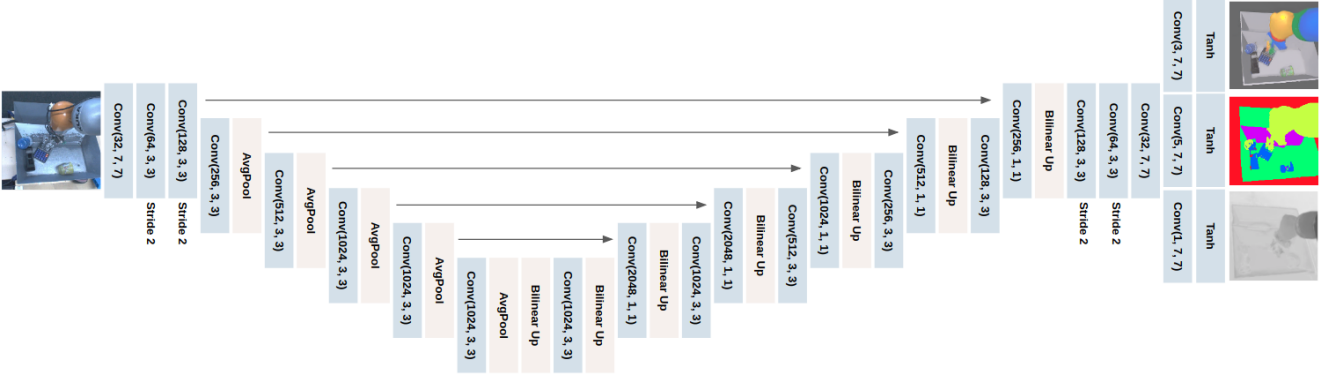

Figure 7: Network architecture of the generator function  $G$ . An RGB image from the source domain (either from the randomized domain or real-world domain) is processed via a U-Net style architecture [48] to produce a generated RGB image  $x_a$ , and auxiliaries that includes a segmentation mask  $m_a$  and depth image  $d_a$ . These auxiliaries forces the generator to extract semantic and depth information about the scene and encode them in the intermediate latent representation, which is then available during the generation of the output image.

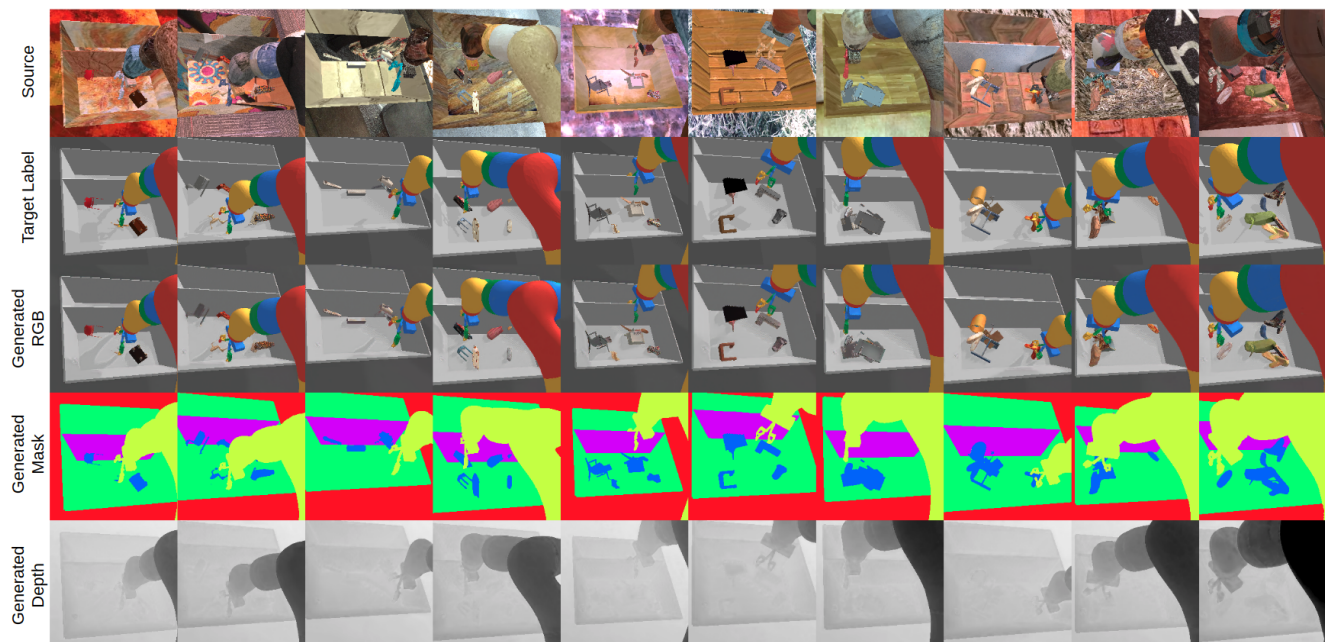

(a) Randomized-to-canonical samples.

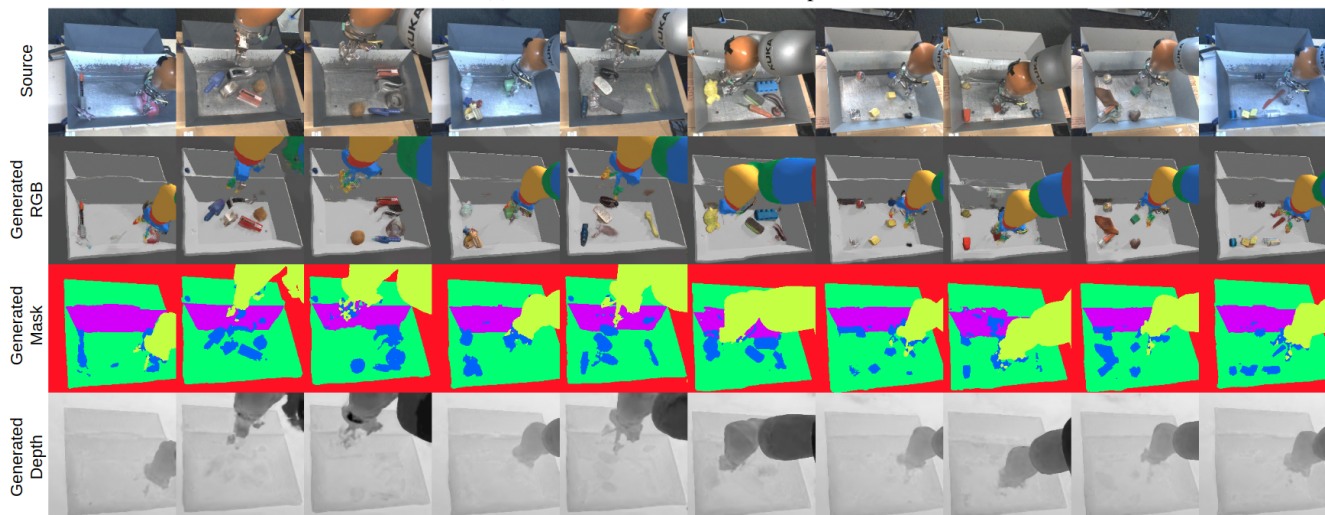

(b) Real-to-canonical samples.

Figure 8: Additional sample outputs of our trained generator  $G$  when given randomized sim images (8a) and real images (8b).
